# Supplementary material
Source: PubMed Central journal article supplement (PMC6371716)
Supplement: ehp3904.s001.acco.pdf [file ehp3904.s001.acco.pdf]

**Note to readers with disabilities:** *EHP* strives to ensure that all journal content is accessible to all readers. However, some figures and Supplemental Material published in *EHP* articles may not conform to [508 standards](#) due to the complexity of the information being presented. If you need assistance accessing journal content, please contact [ehp508@niehs.nih.gov](mailto:ehp508@niehs.nih.gov). Our staff will work with you to assess and meet your accessibility needs within 3 working days.

### **Supplemental Material**

#### **A State-of-the-Science Review of Mercury Biomarkers in Human Populations Worldwide between 2000 and 2018**

Niladri Basu, Milena Horvat, David C. Evers, Irina Zastenskaya, Pál Weihe, and Joanna Tempowski

#### **Table of Contents**

**Table S1.** Summary of national programs that conduct mercury human biomonitoring.

**Table S2.** Number of individuals sampled and mercury biomarker measurements taken in the national biomonitoring studies.

**Table S3.** Comparison of blood total mercury (Hg) concentrations ( $\mu\text{g/L}$ ) in adults and children from nine countries, reported in national biomonitoring programs.

**Table S4.** Count of sub-populations, individuals, and mercury biomarker measurements from the cross-sectional studies, grouped by WHO region, population group by source of exposure, and type of location.

**Table S5.** Reference values for mercury biomarkers.

**Table S6.** Central and upper median hair mercury levels ( $\mu\text{g/g}$ ) from the cross-sectional studies grouped by WHO region, population group (source of exposure), and type of location.

**Table S7.** Comparison of urinary total mercury (Hg) measurement ( $\mu\text{g/L}$ ) in adults and children in five countries reported in national biomonitoring programs.

**Table S8.** Central and upper median urinary mercury levels ( $\mu\text{g/L}$ ) from the cross-sectional studies, grouped by WHO region, population group (source of exposure), and type of location.

#### **References**

**Additional File** - Excel Document

**Table S1. Summary of national programs that conduct mercury human biomonitoring**

| Country              | Survey    | Lead organization                       | Year started | # Cycles; Frequency | Size per cycle | Age (years); Sex                               | Biomarkers                         | Key reference                                      |
|----------------------|-----------|-----------------------------------------|--------------|---------------------|----------------|------------------------------------------------|------------------------------------|----------------------------------------------------|
| Belgium              | FLEHS     | Vlaanderen<br>Departement<br>Omgeving   | 2002         | 2;<br>every 2 yrs   | ~5,000         | 1–65;<br>female adults, children<br>both sexes | Hair                               | Croes et al.<br>2014                               |
| Canada               | CHMS      | Statistics Canada                       | 2007         | 4;<br>every 2 yrs   | ~5,000         | 3–79;<br>both                                  | Blood, urine                       | Health<br>Canada<br>2017                           |
| Czech Republic       | CZ-EHMS   | National Institute<br>of Public Health  | 1994         | 16;<br>~every yr    | ~400           | 8–64;<br>both                                  | Blood, urine, hair                 | NIPH 2015;<br>NIPH 2016;<br>Puklová et<br>al. 2010 |
| France               | Elfe      | Santé publique<br>France                | 2011         | 1                   | ~1,800         | 18–47;<br>pregnant women                       | Hair                               | Dereumeaux<br>et al. 2016                          |
| France               | ENNS      | Santé publique<br>France                | 2006         | 1                   | 1364           | 3–17;<br>both sexes                            | Hair                               | Fréry et al.<br>2011                               |
| Germany              | GerES     | German Federal<br>Environment<br>Agency | 1985         | 5;<br>variable      | ~2,000-5,000   | 3–79;<br>both                                  | Blood, urine                       | German<br>Federal<br>Environment<br>Agency<br>2017 |
| Germany              | ESB       | German Federal<br>Environment<br>Agency | 1981         | 37;<br>each year    | 500            | 20–29;<br>both                                 | Blood, urine                       | ESB<br>Website (see<br>footnote)                   |
| Republic of<br>Korea | KoNEHS    | Korean Ministry of<br>Environment       | 2009         | 3;<br>every 3 yrs   | ~6,000         | 3–19+;<br>both                                 | Blood, urine                       | Burm et al.<br>2016; Choi<br>et al. 2017.          |
| Slovenia             | SLO-HBM   | Jozef Stefan<br>Institute               | 2008         | 2;<br>every 2 yrs   | ~300 - ~900    | 18–49;<br>both                                 | Blood, urine,<br>breast milk, hair | Snoj Tratnik<br>et al. (in<br>press)               |
| Sweden               | Riksmaten | Swedish National<br>Food Agency         | 1990         | 2;<br>variable      | ~300           | 18–80;<br>both                                 | Blood                              | Bjermo et al.<br>2013                              |

|     |        |                                            |      |                |                |             |              |             |
|-----|--------|--------------------------------------------|------|----------------|----------------|-------------|--------------|-------------|
| USA | NHANES | Centers for Disease Control and Prevention | 1999 | 6; every 2 yrs | ~2,500 - 8,000 | 1-70+; both | Blood, urine | US CDC 2017 |
|-----|--------|--------------------------------------------|------|----------------|----------------|-------------|--------------|-------------|

Note: CHMS, Canadian Health Measures Survey; CZ-EHMS, Environmental Health Monitoring System of the Czech Republic; Elfe, French Longitudinal Study since Childhood ; ENNS, French national nutrition survey; ESB, Environmental specimen bank ([https://www.umweltprobenbank.de/en/documents/investigations/results/analytes?analytes=10003&sampling\\_areas=&sampling\\_years=&specimen\\_types=10004](https://www.umweltprobenbank.de/en/documents/investigations/results/analytes?analytes=10003&sampling_areas=&sampling_years=&specimen_types=10004)) ; FLEHS, Flemish Environment and Health Survey; GerES, German Environmental Health Survey; KoNEHS, Korean National Environmental Health Survey; NHANES, National Health and Nutrition Examination Survey; Riksmaten, Swedish food intake survey; SLO-HBM, National Human Biomonitoring Programme of Slovenia.

**Table S2. Number of individuals sampled and mercury biomarker measurements taken in the national biomonitoring studies.**

| Country                        | Demographics                   |              |            |            |              | No. of mercury measurements |                    |                |           |          |
|--------------------------------|--------------------------------|--------------|------------|------------|--------------|-----------------------------|--------------------|----------------|-----------|----------|
|                                | Total sample size <sup>a</sup> | No. children | No. adults | No. males  | No. females  | Total measurements taken    | No. blood total Hg | No. blood MeHg | No. urine | No. hair |
| Belgium <sup>b</sup>           | 465                            | 210          | 255        | Not stated | 255 (adults) | 465                         | 0                  | 0              | 0         | 465      |
| Canada                         | 22,805                         | 9,491        | 13,314     | 11,227     | 11,578       | 41,235                      | 22,425             | 2,075          | 16,734    | 0        |
| Czech Republic <sup>c</sup>    | 7,542                          | 3,623        | 3,919      | Not stated | Not stated   | 13,845                      | 4,700              | 0              | 6,459     | 2,686    |
| France <sup>d</sup>            | 1,799                          | 0            | 1,799      | 0          | 1,799        | 1,799                       | 0                  | 0              | 0         | 1,799    |
| Germany <sup>c</sup>           | 25,772                         | 2,602        | 23,170     | Not stated | Not stated   | 41,045                      | 17,056             | 0              | 23,989    | 0        |
| Republic of Korea <sup>c</sup> | 14,688                         | 2,346        | 12,342     | Not stated | Not stated   | 14,688                      | 14,688             | 0              | 0         | 0        |
| Slovenia                       | 1,095                          | 0            | 1,095      | 553        | 542          | 3,523                       | 1,085              | 0              | 1,020     | 947      |
| Sweden                         | 273                            | 0            |            | 128        | 145          | 273                         | 273                | 0              | 0         | 0        |
| USA                            | 46,974                         | 19,086       | 27,888     | 23,292     | 23,682       | 75,778                      | 46,974             | 13,016         | 15,788    | 0        |
| <b>Totals</b>                  | <b>121,413</b>                 |              |            |            |              | <b>192,651</b>              |                    |                |           |          |

Note: Hg, mercury; MeHg, methylmercury.

<sup>a</sup> Measures span the years 1996-2015

<sup>b</sup> Samples were collected from pregnant women and adolescents. Results for the adolescents were not broken down by sex. Only hair was sampled.

<sup>c</sup> Results were not broken down by sex.

<sup>d</sup> Study was carried out in pregnant women on hair samples only

**Table S3. Comparison of blood total mercury (Hg) concentrations ( $\mu\text{g/L}$ ) in adults and children from nine countries, reported in national biomonitoring programs**

| Demographics                 | Belgium <sup>a</sup> | Canada       | Czech Republic | France <sup>a</sup>            | Germany                                 | Republic of Korea                      | Slovenia  | Sweden <sup>b</sup> | USA       |
|------------------------------|----------------------|--------------|----------------|--------------------------------|-----------------------------------------|----------------------------------------|-----------|---------------------|-----------|
|                              | FLEHS2               | CHMS Cycle 2 | CZ-HBM         | Elfe (Adults), ENNS (Children) | GerES-III (Adults), GerES-IV (Children) | KoNEHS-2 (Adults), KorEHS-C (Children) | SLO-HBM   | Riksmaten           | NHANES    |
| <b>Adults</b>                |                      |              |                |                                |                                         |                                        |           |                     |           |
| Year                         | 2007-2011            | 2009-2011    | 2015           | 2011                           | 1998                                    | 2014                                   | 2008-2012 | 2010-2011           | 2011-2012 |
| Age                          | 18-42                | 20-39        | 18-64          | 18-47                          | 25-69                                   | 19+                                    | 18-49     | 18-80               | 20+       |
| Sample Size                  | 255                  | 1313         | 302            | 1799                           | 3973                                    | 6457                                   | 1,085     | 273                 | 5030      |
| Blood Hg (P50 concentration) | 1.36                 | 0.65         | 0.65           | 1.68                           | 0.7                                     | 3.05                                   | 1.2       | 1.13                | 0.79      |
| Blood Hg (P95 concentration) | 3.44                 | 5.2          | 2.5            | 5.56                           | 2.4                                     | 9.05                                   | 4.78      | 3.45                | 5.02      |
| <b>Children</b>              |                      |              |                |                                |                                         |                                        |           |                     |           |
| Year                         | 2007-2011            | 2009-2011    | 2008           | 2006-2007                      | 2003-2006                               | 2012-2014                              | 2008      | -                   | 2011-2012 |
| Age                          | 14-16                | 6-11         | 8-10           | 3-17                           | 6-14                                    | 3-18                                   | 6-11      | -                   | 6-11      |
| Sample Size                  | 210                  | 961          | 198            | 1364                           | 1240                                    | 2346                                   | 174       | -                   | 1048      |
| Blood Hg (P50 concentration) | 0.76                 | 0.21         | 0.4            | 1.52                           | 0.3                                     | 1.8                                    | 0.79      | -                   | 0.32      |
| Blood Hg (P95 concentration) | 1.88                 | 2            | 1.4            | 4.8                            | 1                                       | 3.68                                   | 2.19      | -                   | 1.4       |

Note. CHMS – Canadian Health Measures Survey (Health Canada 2017); CZ-EHMS – Environmental Health Monitoring System of the Czech Republic (NIPH 2009; NIPH 2016); Elfe - French Longitudinal Study since Childhood (Dereumeaux et al. 2016); ENNS - French National Nutrition and Health Survey (Fréry et al. 2011); FLEHS2 - Flemish Environment and Health Survey, second cycle (Croes et al. 2014); GerES - German Environmental Health Survey (German Federal Environment Agency 2017); KoNEHS - Korean National Environmental Health Survey (Choi et al. 2017); KorEHS-C - Korean Environmental Health Survey in Children and Adolescents (Burm et al. 2016); NHANES – National Health and Nutrition Examination Survey (US CDC 2017); Riksmaten – Swedish food intake survey (Bjermo et al. 2013); SLO-HBM - National Human Biomonitoring Programme of Slovenia (Snoj Tratnik et al. (in press)). P50, 50<sup>th</sup> percentile value; P95, 95<sup>th</sup> percentile value

To enable comparison, where possible data are presented from study cycles from similar time periods; Males and females are grouped together.

<sup>a</sup> For Belgium and France the blood mercury values were calculated from hair mercury levels in women (adults) and children (both sexes).

<sup>b</sup> In Sweden, the Riksmaten study only involved adults.

**Table S4. Count of sub-populations, individuals, and mercury biomarker measurements from the cross-sectional studies, grouped by WHO region, population group by source of exposure, and type of location**

| Grouping                                     | No. subpop. | No. individuals | No. measurements | Cord blood  |                  | Hair        |                  | Urine       |                  | Whole blood |                  |
|----------------------------------------------|-------------|-----------------|------------------|-------------|------------------|-------------|------------------|-------------|------------------|-------------|------------------|
|                                              |             |                 |                  | No. subpop. | No. measurements |
| <b>WHO REGION<sup>a</sup></b>                |             |                 |                  |             |                  |             |                  |             |                  |             |                  |
| Africa                                       | 23          | 3,266           | 4,533            | 3           | 511              | 10          | 1,156            | 9           | 1,425            | 9           | 1,441            |
| Americas                                     | 113         | 43,119          | 49,638           | 6           | 2,429            | 57          | 23,627           | 15          | 4,049            | 54          | 19,533           |
| E Medit                                      | 29          | 11,565          | 11,736           | 1           | 1,561            | 14          | 3,608            | 7           | 2,377            | 8           | 4,190            |
| Europe                                       | 130         | 36,711          | 40,512           | 5           | 1,058            | 64          | 15,588           | 30          | 6,855            | 46          | 17,011           |
| SE Asia                                      | 20          | 4,537           | 5,057            | 0           | 0                | 13          | 3,031            | 7           | 813              | 4           | 1,213            |
| W Pacific                                    | 126         | 68,632          | 73,034           | 14          | 2,621            | 56          | 22,900           | 19          | 5,584            | 57          | 41,929           |
| <i>Total for all pops<sup>a</sup> groups</i> | <b>441</b>  | <b>167,830</b>  | <b>184,510</b>   | <b>29</b>   | <b>8180</b>      | <b>214</b>  | <b>69,910</b>    | <b>87</b>   | <b>21,103</b>    | <b>178</b>  | <b>85,317</b>    |
| <b>POPULATION GROUPS</b>                     |             |                 |                  |             |                  |             |                  |             |                  |             |                  |
| <b>Point source</b>                          |             |                 |                  |             |                  |             |                  |             |                  |             |                  |
| ASGM                                         | 30          | 7,800           | 10,842           | 0           | 0                | 23          | 5,561            | 17          | 3,463            | 10          | 1,818            |
| Contam. sites                                | 45          | 7,588           | 8,770            | 0           | 0                | 16          | 2,234            | 24          | 4,010            | 13          | 2,526            |
| Dental workers                               | 4           | 1,285           | 2,645            | 0           | 0                | 3           | 979              | 3           | 1,232            | 1           | 434              |
| <i>Total (point source groups)</i>           | <b>79</b>   | <b>16,673</b>   | <b>22,257</b>    | <b>0</b>    | <b>0</b>         | <b>42</b>   | <b>8,774</b>     | <b>44</b>   | <b>8,705</b>     | <b>24</b>   | <b>4,778</b>     |
| <b>Diet</b>                                  |             |                 |                  |             |                  |             |                  |             |                  |             |                  |
| Fish consumer                                | 40          | 13,550          | 15,393           | 0           | 0                | 23          | 8,398            | 3           | 680              | 23          | 6,315            |
| Indigenous peoples                           | 16          | 8,729           | 10,949           | 0           | 0                | 15          | 7,875            | 0           | 0                | 3           | 3,074            |
| Arctic pop.                                  | 15          | 7,472           | 7,472            | 0           | 0                | 1           | 361              | 0           | 0                | 14          | 7,111            |
| <i>Total (diet groups)</i>                   | <b>71</b>   | <b>29,751</b>   | <b>33,814</b>    | <b>0</b>    | <b>0</b>         | <b>39</b>   | <b>16,634</b>    | <b>3</b>    | <b>680</b>       | <b>40</b>   | <b>16,500</b>    |
| <b>Fetus</b>                                 |             |                 |                  |             |                  |             |                  |             |                  |             |                  |

| Grouping                       | No. subpop. | No. individuals | No. measurements | Cord blood  |                  | Hair        |                  | Urine       |                  | Whole blood |                  |
|--------------------------------|-------------|-----------------|------------------|-------------|------------------|-------------|------------------|-------------|------------------|-------------|------------------|
|                                |             |                 |                  | No. subpop. | No. measurements |
| General pop.                   | 83          | 22,567          | 23,847           | 26          | 7,586            | 21          | 5,181            | 5           | 1,283            | 38          | 9,797            |
| Fish consumer                  | 6           | 1,188           | 1,474            | 3           | 594              | 3           | 286              | 0           | 0                | 3           | 594              |
| Indigenous peoples             | 1           | 1,510           | 1,510            | 0           | 0                | 0           | 0                | 0           | 0                | 1           | 1,510            |
| <b>Total (fetus groups)</b>    | <b>90</b>   | <b>25,265</b>   | <b>26,831</b>    | <b>29</b>   | <b>8180</b>      | <b>24</b>   | <b>5,467</b>     | <b>5</b>    | <b>1,283</b>     | <b>42</b>   | <b>11,901</b>    |
| <b>General pop</b>             | 201         | 96,141          | 101,606          | 0           | 0                | 109         | 39,035           | 35          | 10,435           | 72          | 52,136           |
| <b>LOCATION TYPE</b>           |             |                 |                  |             |                  |             |                  |             |                  |             |                  |
| Inland-no water                | 179         | 55,088          | 60,271           | 11          | 3,527            | 86          | 21,138           | 46          | 9,792            | 64          | 25,814           |
| Inland-river/lake              | 64          | 24,813          | 27,352           | 5           | 2,163            | 51          | 18,588           | 9           | 1,889            | 15          | 4,712            |
| Coastal - Atlantic             | 28          | 11,357          | 11,618           | 3           | 516              | 10          | 4,487            | 2           | 359              | 14          | 6,256            |
| Coastal - Pacific              | 85          | 35,855          | 38,040           | 7           | 1,356            | 43          | 19,757           | 14          | 3,528            | 30          | 13,399           |
| Coastal - Arctic               | 19          | 10,757          | 13,046           | 0           | 0                | 3           | 2,581            | 1           | 69               | 18          | 10,396           |
| Coastal - Mediterr             | 15          | 2,439           | 2,887            | 0           | 0                | 7           | 1,023            | 7           | 1,238            | 3           | 626              |
| Coastal - other                | 7           | 1,213           | 1,213            | 0           | 0                | 6           | 914              | 0           | 0                | 1           | 299              |
| SIDS                           | 16          | 1,325           | 1,426            | 2           | 341              | 1           | 110              | 0           | 0                | 14          | 975              |
| Multiple                       | 25          | 24,524          | 27,528           | 1           | 277              | 6           | 967              | 6           | 3,851            | 17          | 22,433           |
| Unknown                        | 3           | 459             | 1,129            | 0           | 0                | 1           | 345              | 2           | 377              | 2           | 407              |
| <b>Total (location groups)</b> | <b>441</b>  | <b>167,830</b>  | <b>184,510</b>   | <b>29</b>   | <b>8,180</b>     | <b>214</b>  | <b>69,910</b>    | <b>87</b>   | <b>21,103</b>    | <b>178</b>  | <b>85,317</b>    |

Note. Biomarker measurements were not found for all populations grouped by exposure source or by location type. Where data were not found this is shown as a zero in the table.

Note. row totals for "No. subpop." may not reflect row count data for "No. subpop" associated with a given biomarker because some individuals had multiple biomarker measures taken (e.g., a given subpopulation included individuals with mercury measures in both hair and urine).

No. subpop., number of subpopulations studied; WHO, World Health Organization.

<sup>a</sup>all populations

WHO regions: E Medit, Eastern Mediterranean; SE Asia, South East Asia; W Pacific, Western Pacific.

Point Source: ASGM, individuals engaged in artisanal and small-scale gold mining; Contam. sites, individuals living at contaminated sites; Dental workers, individuals exposed from working in dental settings.

Diet: Fish consumer, non-Indigenous or non-Arctic groups that were identified in the study as being ones to consume relatively high amounts of seafood; Indigenous peoples, self-identified group by study authors and not including those from the Arctic and mainly comprised of populations from the Amazonian region; Arctic pop., populations living in the Arctic or Sub-Arctic region.

Fetus: General pop., general population without specific exposures to mercury; Fish consumer, see above under 'Diet'; Indigenous peoples, see above under 'Diet'.

Location type: Inland, populations living away from coastal regions, either living close to rivers or lakes from where they might take fish (river/lake) or not associated with any water (no water);

Coastal, populations living on the coast of various oceans (e.g., Mediterr, Mediterranean sea) from where they might take seafood; SIDS, populations living in small island developing states;

Multiple, studies where the populations were associated with different categories; unknown, not enough information provided in the study to assign a particular location.



**Table S5. Reference values for mercury biomarkers**

| Source                                                                                                                                                                                                                                                                                                      | Blood <sup>a</sup>                                                        | Hair <sup>a</sup>           | Cord blood <sup>b</sup> | Urine                                                              |
|-------------------------------------------------------------------------------------------------------------------------------------------------------------------------------------------------------------------------------------------------------------------------------------------------------------|---------------------------------------------------------------------------|-----------------------------|-------------------------|--------------------------------------------------------------------|
| FAO/WHO Joint Expert Committee on Food Additives no observed adverse effect level – basis for estimation of the provisional tolerable weekly intake value) (JECFA 2004; 2007)                                                                                                                               | 56 µg/L ( <i>maternal</i> )                                               | 14 µg/g ( <i>maternal</i> ) | Not applicable          | Not applicable                                                     |
| US EPA Reference Dose (US EPA 2001)                                                                                                                                                                                                                                                                         | 3.5 µg/L                                                                  | 1 µg/g                      | 5.8 µg/L                | Not applicable                                                     |
| Qualitative conclusions by expert panel on “High” Levels (Karagas et al. 2012)                                                                                                                                                                                                                              | >12 µg/L                                                                  | >4 µg/g                     | >20 µg/L                | Not applicable                                                     |
| Health Canada (2004)                                                                                                                                                                                                                                                                                        | 20 µg/L (general adult population)                                        | 6 µg/g                      | Not applicable          | Not applicable                                                     |
| Health Canada existing and proposed harmonized blood methylmercury guidance values – values below which no follow-up action is needed (Legrand et al. 2010)                                                                                                                                                 | 8 µg/L (pregnant women);<br>20 µg/L (females birth–49 yrs, males <18 yrs) | 2 µg/g;<br>6 µg/g;          | 13.6 µg/L;<br>29 µg/L;  | Not applicable                                                     |
| Health Canada existing and proposed harmonized blood methylmercury guidance values – values for which immediate follow-up action is needed (Legrand et al. 2010)                                                                                                                                            | >100 µg/L (females >50 yrs, males >18 yrs)                                | >25 µg/g                    | Not applicable          | Not applicable                                                     |
| German HBM-1 (concentration of a substance in human biological material at which and below which, according to the current knowledge and assessment by the HBM-Commission, there is no risk of adverse health effects) (Schulz et al. 2007)                                                                 | 5 µg/L                                                                    | 1.25 µg/g                   | 8.5 µg/L                | 7 µg/L                                                             |
| German HBM-2 (concentration of a substance in human biological material at which and above which adverse health effects are possible and, consequently, an acute need for the reduction of exposure and the provision of biomedical advice is given) (Schulz et al. 2007)                                   | 15 µg/L                                                                   | 3.75 µg/g                   | 25.5 µg/L               | 25 µg/L                                                            |
| American Conference of Governmental Industrial Hygienists biological exposure index (concentration below which most workers should not experience adverse health effects) (ACGIH 2016)                                                                                                                      | 15 µg/L (total inorganic mercury)                                         | Not applicable              | Not applicable          | 20 µg/g creatinine (total inorganic mercury)                       |
| Commission for the Investigation of Health Hazards of Chemical Compounds in the Work Area (Germany) BAT value (Biologische Arbeitsstoff-Toleranzwerte – biological tolerance value) – concentration below which workers should not experience adverse health effects (Deutsche Forschungsgemeinschaft 2017) |                                                                           |                             |                         | 25 µg/g creatinine (30 µg/L) (mercury and its inorganic compounds) |

|  |  |  |  |  |
|--|--|--|--|--|
|  |  |  |  |  |
|--|--|--|--|--|

Note. HBM, health-related human biomonitoring values.

<sup>a</sup> Values in italics for hair concentration have been calculated based a methylmercury hair-to-blood ratio of 250 that the Joint Food and Agriculture Organization (FAO) and WHO Expert Committee on Food Additives (JECFA 2004) established. For further information see text.

<sup>b</sup> Values in italics for cord blood concentration have been calculated based on the assumption that cord blood concentrations are 70% higher than maternal blood concentrations. For further information see text.

**Table S6. Central and upper median hair mercury levels ( $\mu\text{g/g}$ ) from the cross-sectional studies grouped by WHO region, population group (source of exposure), and type of location**

| Grouping                                         | No. subpop. | No. individuals | Hair (central value) |             |             | Hair (upper value) |             |              |
|--------------------------------------------------|-------------|-----------------|----------------------|-------------|-------------|--------------------|-------------|--------------|
|                                                  |             |                 | 25%                  | 50%         | 75%         | 25%                | 50%         | 75%          |
| <b>WHO REGION</b>                                |             |                 |                      |             |             |                    |             |              |
| <b>All pops<sup>a</sup></b>                      |             |                 |                      |             |             |                    |             |              |
| Africa                                           | 10          | 1,156           | 0.40                 | 0.69        | 1.25        | 1.10               | 7.05        | 29.10        |
| Americas                                         | 57          | 23,627          | 0.69                 | 2.02        | 4.30        | 4.98               | 15.40       | 34.10        |
| E Mediterranean                                  | 14          | 3,608           | 0.45                 | 1.68        | 3.08        | 3.57               | 11.34       | 14.30        |
| Europe                                           | 64          | 15,588          | 0.17                 | 0.30        | 0.70        | 0.62               | 1.51        | 3.76         |
| South-East Asia                                  | 13          | 3,031           | 0.73                 | 3.10        | 5.80        | 10.60              | 21.00       | 38.89        |
| Western Pacific                                  | 56          | 22,900          | 0.67                 | 1.40        | 1.98        | 1.95               | 6.32        | 17.76        |
| <i>Total for all pops<sup>a</sup> groups</i>     | <b>214</b>  | <b>69,910</b>   | <b>0.45</b>          | <b>0.99</b> | <b>2.49</b> | <b>1.79</b>        | <b>6.15</b> | <b>19.92</b> |
| <b>General pops<sup>b</sup></b>                  |             |                 |                      |             |             |                    |             |              |
| Africa                                           | 2           | 162             | 0.07                 | 0.21        | 0.34        | 0.60               | 0.63        | 0.65         |
| Americas                                         | 8           | 3,308           | 0.30                 | 0.44        | 1.30        | 3.82               | 5.85        | 17.68        |
| E Mediterranean                                  | 8           | 2,087           | 0.56                 | 1.42        | 3.01        | 5.59               | 11.34       | 19.38        |
| Europe                                           | 49          | 12,917          | 0.14                 | 0.25        | 0.57        | 0.55               | 1.32        | 2.86         |
| South-East Asia                                  | 6           | 2,144           | 0.67                 | 0.73        | 2.50        | 2.60               | 9.55        | 17.60        |
| Western Pacific                                  | 36          | 18,417          | 0.76                 | 1.47        | 1.85        | 2.15               | 7.80        | 19.18        |
| <i>Total for general pops<sup>b</sup> groups</i> | <b>109</b>  | <b>39,035</b>   | <b>0.28</b>          | <b>0.68</b> | <b>1.66</b> | <b>1.26</b>        | <b>4.08</b> | <b>12.52</b> |
| <b>POPULATION GROUPS</b>                         |             |                 |                      |             |             |                    |             |              |
| <b>Point source</b>                              |             |                 |                      |             |             |                    |             |              |
| ASGM                                             | 23          | 5,561           | 1.18                 | 2.60        | 3.26        | 14.40              | 22.90       | 40.95        |
| Contaminated sites                               | 16          | 2,234           | 0.55                 | 0.99        | 2.51        | 1.58               | 4.05        | 11.00        |
| Dental workers                                   | 3           | 979             | 0.59                 | 0.69        | 3.03        | 3.71               | 6.15        | 8.38         |

| Grouping                           | No. subpop. | No. individuals | Hair (central value) |             |             | Hair (upper value) |              |              |
|------------------------------------|-------------|-----------------|----------------------|-------------|-------------|--------------------|--------------|--------------|
|                                    |             |                 | 25%                  | 50%         | 75%         | 25%                | 50%          | 75%          |
| <i>Total (point source groups)</i> | <b>42</b>   | <b>8,774</b>    | <b>0.78</b>          | <b>1.91</b> | <b>3.08</b> | <b>4.13</b>        | <b>14.40</b> | <b>35.90</b> |
| <b>Diet</b>                        |             |                 |                      |             |             |                    |              |              |
| Fish consumer                      | 23          | 8,398           | 0.71                 | 3.04        | 8.00        | 3.20               | 11.67        | 47.00        |
| Indigenous peoples Arctic pop.     | 15          | 7,875           | 1.86                 | 4.45        | 5.80        | 10.90              | 17.08        | 39.55        |
| <i>Total (diet groups)</i>         | <b>39</b>   | <b>16,634</b>   | <b>0.76</b>          | <b>3.80</b> | <b>6.74</b> | <b>4.74</b>        | <b>14.60</b> | <b>41.00</b> |
| <b>Fetus</b>                       |             |                 |                      |             |             |                    |              |              |
| General pop.                       | 21          | 5,181           | 0.22                 | 0.48        | 1.26        | 0.83               | 1.70         | 5.30         |
| Fish consumer                      | 3           | 286             | 1.70                 | 1.80        | 3.60        | 26.33              | 32.95        | 47.68        |
| <i>Total (fetus groups)</i>        | <b>24</b>   | <b>5,467</b>    | <b>0.23</b>          | <b>0.52</b> | <b>1.51</b> | <b>0.89</b>        | <b>2.73</b>  | <b>8.13</b>  |
| <b>General pop</b>                 | 109         | 39,035          | 0.28                 | 0.68        | 1.66        | 1.26               | 4.08         | 12.52        |
| <b>LOCATION TYPE</b>               |             |                 |                      |             |             |                    |              |              |
| Inland-no water                    | 86          | 21,138          | 0.19                 | 0.43        | 0.78        | 0.64               | 1.70         | 5.82         |
| Inland-river/lake                  | 51          | 18,588          | 0.70                 | 2.29        | 4.68        | 6.30               | 16.28        | 37.45        |
| Coastal - Atlantic                 | 10          | 4,487           | 0.46                 | 0.62        | 0.91        | 3.03               | 4.36         | 5.30         |
| Coastal - Pacific                  | 43          | 19,757          | 1.40                 | 1.75        | 2.50        | 6.30               | 11.30        | 21.36        |
| Coastal - Arctic                   | 3           | 2,581           | 0.63                 | 0.74        | 1.08        | 3.41               | 5.20         | 23.60        |
| Coastal - Mediterr                 | 7           | 1,023           | 0.62                 | 0.88        | 1.47        | 2.87               | 8.70         | 9.68         |
| Coastal - other                    | 6           | 914             | 1.89                 | 2.49        | 3.55        | 8.97               | 13.75        | 24.46        |
| SIDS                               | 1           | 110             |                      |             |             |                    |              |              |
| Multiple                           | 6           | 967             | 0.60                 | 0.70        | 0.80        | 1.28               | 2.59         | 6.60         |
| Unknown                            | 1           | 345             |                      |             |             |                    |              |              |
| <i>Total (location groups)</i>     | <b>214</b>  | <b>69,910</b>   | <b>0.45</b>          | <b>0.99</b> | <b>2.49</b> | <b>1.79</b>        | <b>6.15</b>  | <b>19.92</b> |

Note. No. subpop., number of subpopulations studied; WHO, World Health Organization.

<sup>a</sup> all populations, i.e. both those with probable high exposures and those with no known exposures to mercury

<sup>b</sup> general populations only, i.e. those with no known exposures to mercury

WHO regions: E Medit, Eastern Mediterranean; SE Asia, South East Asia; W Pacific, Western Pacific.

Point Source: ASGM, individuals engaged in artisanal and small-scale gold mining; Contam. sites, individuals living at contaminated sites; Dental workers, individuals exposed from working in dental settings.

Diet: Fish consumer, non-Indigenous or non-Arctic groups that were identified in the study as being ones to consume relatively high amounts of seafood; Indigenous peoples, self-identified group by study authors and not including those from the Arctic and mainly comprised of populations from the Amazonian region; Arctic pop., populations living in the Arctic or Sub-Arctic region.

Fetus: General pop., general population without specific exposures to mercury; Fish consumer, see above under 'Diet'.

Location type: Inland, populations living away from coastal regions, either living close to rivers or lakes from where they might take fish (river/lake) or not associated with any water (no water);

Coastal, populations living on the coast of various oceans (e.g., Mediterr, Mediterranean sea) from where they might take seafood; SIDS, populations living in small island developing states;

Multiple, studies where the populations were associated with different categories; unknown, not enough information provided in the study to assign a particular location.

**Table S7. Comparison of urinary total mercury (Hg) measurement ( $\mu\text{g/L}$ ) in adults and children in five countries reported in national biomonitoring programs**

| Demographics                 | Canada<br>CHMS Cycle 3                                       | Czech Republic<br>CZ-HBM    | Germany<br>GerES-III (Adults),<br>GerES-IV (Children) | Slovenia<br>SLO-HBM         | USA<br>NHANES                                                 |
|------------------------------|--------------------------------------------------------------|-----------------------------|-------------------------------------------------------|-----------------------------|---------------------------------------------------------------|
| <b>Adults</b>                |                                                              |                             |                                                       |                             |                                                               |
| Year                         | 2012–2013                                                    | 2015                        | 1998                                                  | 2008–2012                   | 2013–2014                                                     |
| Age (yrs)                    | 20–39                                                        | 18–64                       | 18–69                                                 | 18–49                       | 20+                                                           |
| Sample Size                  | 1048                                                         | 234                         | 4052                                                  | 1020                        | 1813 (1812) <sup>a</sup>                                      |
| Urine Hg (P50 concentration) | 0.20<br>(0.22) <sup>b</sup>                                  | 0.91<br>(0.91) <sup>b</sup> | 0.4                                                   | 0.45<br>(0.47) <sup>b</sup> | 0.24<br>(0.30) <sup>b</sup>                                   |
| Urine Hg (P95 concentration) | 1.1<br>(1.20) <sup>b</sup>                                   | 6.34<br>(4.67) <sup>b</sup> | 3.00                                                  | 3.47<br>(2.48) <sup>b</sup> | 1.76<br>(1.76) <sup>b</sup>                                   |
| <b>Children</b>              |                                                              |                             |                                                       |                             |                                                               |
| Year                         | 2012–2013                                                    | 2008                        | 2003–2006                                             | 2008                        | 2013–2014                                                     |
| Age (yrs)                    | 6–11                                                         | 8–10                        | 3–14                                                  | 6–11                        | 6–11                                                          |
| Sample Size                  | 1010                                                         | 318                         | 1734                                                  | 164                         | 401                                                           |
| Urine Hg (P50 concentration) | <LoD (LoD=0.20)<br><LoD <sup>b</sup> (LoD=0.20) <sup>b</sup> | 0.20 <sup>b</sup>           | <0.1<br>(LoD=0.1)                                     | 0.76 (0.73) <sup>b</sup>    | <LoD (LoD=0.13);<br><LoD <sup>b</sup> (LoD=0.13) <sup>b</sup> |
| Urine Hg (P95 concentration) | 0.93<br>(1.9) <sup>b</sup>                                   | 1.10 <sup>b</sup>           | 0.5                                                   | 4.64<br>(4.15) <sup>b</sup> | 0.89<br>(1.11) <sup>b</sup>                                   |

Note. CHMS – Canadian Health Measures Survey, 3<sup>rd</sup> cycle (Health Canada 2017); CZ-EHMS – Environmental Health Monitoring System of the Czech Republic (NIPH 2009; NIPH 2016); GerES - German Environmental Survey (German Federal Environment Agency 2017); NHANES – National Health and Nutrition Examination Survey (US CDC 2017); SLO-HBM - National Human Biomonitoring Programme of Slovenia (Snoj Tratnik et al. (in press));

P50, 50<sup>th</sup> percentile value; P95, 95<sup>th</sup> percentile value

LoD, limit of detection by the analytical method used

To enable comparison, where possible data are presented from study cycles from similar time periods. Males and females are grouped together.

<sup>a</sup> number of samples for which creatinine-adjusted values are available

<sup>b</sup> creatinine-adjusted values

**Table S8. Central and upper median urinary mercury levels ( $\mu\text{g/L}$ ) from the cross-sectional studies, grouped by WHO region, population group (source of exposure), and type of location**

| Grouping                                         | No. subpop. | No. individuals | Urine (central value) |            |             | Urine (upper value) |             |              |
|--------------------------------------------------|-------------|-----------------|-----------------------|------------|-------------|---------------------|-------------|--------------|
|                                                  |             |                 | 25%                   | 50%        | 75%         | 25%                 | 50%         | 75%          |
| <b>WHO REGION</b>                                |             |                 |                       |            |             |                     |             |              |
| <b>All pops<sup>a</sup></b>                      |             |                 |                       |            |             |                     |             |              |
| Africa                                           | 9           | 1,425           | 2.0                   | 3.9        | 15.9        | 41.8                | 541.0       | 1451.0       |
| Americas                                         | 15          | 4,049           | 0.9                   | 1.8        | 5.6         | 4.2                 | 17.0        | 116.0        |
| E Mediterranean                                  | 7           | 2,377           | 0.9                   | 2.8        | 4.4         | 4.3                 | 4.8         | 15.7         |
| Europe                                           | 30          | 6,855           | 0.5                   | 1.0        | 1.3         | 3.5                 | 6.2         | 16.2         |
| South-East Asia                                  | 7           | 813             | 5.9                   | 8.2        | 14.4        | 22.8                | 35.7        | 177.2        |
| Western Pacific                                  | 19          | 5,584           | 0.9                   | 1.3        | 2.9         | 3.0                 | 6.7         | 33.2         |
| <i>Total for all pops<sup>a</sup> groups</i>     | <b>87</b>   | <b>21,103</b>   | <b>0.82</b>           | <b>1.4</b> | <b>5.2</b>  | <b>3.4</b>          | <b>10</b>   | <b>46.5</b>  |
| <b>General pops<sup>b</sup></b>                  |             |                 |                       |            |             |                     |             |              |
| Africa                                           | 1           | 151             |                       |            |             |                     |             |              |
| Americas                                         | 4           | 910             | 0.3                   | 0.4        | 1.0         | 2.5                 | 4.2         | 7.8          |
| E Mediterranean                                  | 5           | 1,669           | 1.0                   | 2.8        | 4.4         | 4.8                 | 4.8         | 15.6         |
| Europe                                           | 16          | 4,706           | 0.5                   | 0.8        | 1.1         | 5.0                 | 6.3         | 11.6         |
| South-East Asia                                  | 2           | 184             |                       |            |             |                     |             |              |
| Western Pacific                                  | 7           | 2,815           | 1.2                   | 1.4        | 1.6         | 3.1                 | 4.9         | 16.6         |
| <i>Total for general pops<sup>b</sup> groups</i> | <b>35</b>   | <b>10,435</b>   | <b>0.6</b>            | <b>1.0</b> | <b>1.5</b>  | <b>3.9</b>          | <b>6.1</b>  | <b>13.5</b>  |
| <b>POPULATION GROUPS</b>                         |             |                 |                       |            |             |                     |             |              |
| <b>Point source</b>                              |             |                 |                       |            |             |                     |             |              |
| ASGM                                             | 17          | 3,463           | 2.9                   | 5.9        | 14.4        | 78.5                | 188.0       | 374.0        |
| Contaminated sites                               | 24          | 4,010           | 1.1                   | 3.0        | 8.3         | 3.1                 | 18.6        | 42.5         |
| Dental workers                                   | 3           | 1,232           | 1.2                   | 1.3        | 4.8         | 5.9                 | 9.3         | 16.0         |
| <i>Total (point source groups)</i>               | <b>44</b>   | <b>8,705</b>    | <b>1.4</b>            | <b>4.2</b> | <b>10.9</b> | <b>8.6</b>          | <b>41.3</b> | <b>188.0</b> |

| Grouping                       | No. subpop. | No. individuals | Urine (central value) |            |            | Urine (upper value) |            |             |
|--------------------------------|-------------|-----------------|-----------------------|------------|------------|---------------------|------------|-------------|
|                                |             |                 | 25%                   | 50%        | 75%        | 25%                 | 50%        | 75%         |
| <b>Diet</b>                    |             |                 |                       |            |            |                     |            |             |
| Fish consumer                  | 3           | 680             | 0.8                   | 1.0        | 3.3        | 3.2                 | 3.5        | 19.8        |
| Indigenous peoples             |             |                 |                       |            |            |                     |            |             |
| <b>Total (diet groups)</b>     | <b>3</b>    | <b>680</b>      | <b>0.8</b>            | <b>1.0</b> | <b>3.3</b> | <b>3.2</b>          | <b>3.5</b> | <b>19.8</b> |
| <b>Fetus</b>                   |             |                 |                       |            |            |                     |            |             |
| General pop.                   | 5           | 1,283           | 0.4                   | 0.7        | 0.8        | 1.3                 | 1.7        | 2.3         |
| Fish consumer                  |             |                 |                       |            |            |                     |            |             |
| <b>Total (fetus groups)</b>    | <b>5</b>    | <b>1,283</b>    | <b>0.4</b>            | <b>0.7</b> | <b>0.8</b> | <b>1.3</b>          | <b>1.7</b> | <b>2.3</b>  |
| <b>General pop</b>             | <b>35</b>   | <b>10,435</b>   | <b>0.6</b>            | <b>1.0</b> | <b>1.5</b> | <b>3.9</b>          | <b>6.1</b> | <b>13.5</b> |
| <b>LOCATION TYPE</b>           |             |                 |                       |            |            |                     |            |             |
| Inland-general                 | 46          | 9,792           | 0.7                   | 1.3        | 4.3        | 3.4                 | 9.4        | 60.5        |
| Inland-river/lake              | 9           | 1,889           | 5.5                   | 8.6        | 10.9       | 36.1                | 147.0      | 188.0       |
| Coastal - Atlantic             | 2           | 359             |                       |            |            |                     |            |             |
| Coastal - Pacific              | 14          | 3,528           | 0.8                   | 1.5        | 4.9        | 1.7                 | 13.3       | 26.3        |
| Coastal - Arctic               | 1           | 69              |                       |            |            |                     |            |             |
| Coastal - Mediterr             | 7           | 1,238           | 0.8                   | 0.9        | 1.4        | 6.2                 | 8.4        | 16.2        |
| Coastal - other                |             |                 |                       |            |            |                     |            |             |
| Multiple                       | 6           | 3,851           | 1.1                   | 1.2        | 1.3        | 3.2                 | 4.9        | 6.1         |
| Unknown                        | 2           | 377             | 0.6                   | 1.7        | 2.8        | 3.0                 | 10.0       | 17.0        |
| <b>Total (location groups)</b> | <b>87</b>   | <b>21,103</b>   | <b>0.82</b>           | <b>1.4</b> | <b>5.2</b> | <b>3.4</b>          | <b>10</b>  | <b>46.5</b> |

Note. No. subpop., number of subpopulations studied; WHO, World Health Organization.

<sup>a</sup> all populations, i.e. both those with probable high exposures and those with no known exposures to mercury

<sup>b</sup> general populations only, i.e. those with no known exposures to mercury

WHO regions: E Medit, Eastern Mediterranean; SE Asia, South East Asia; W Pacific, Western Pacific.

Point Source: ASGM, individuals engaged in artisanal and small-scale gold mining; Contam. sites, individuals living at contaminated sites; Dental workers, individuals exposed from working in dental settings.

Diet: Fish consumer, non-Indigenous or non-Arctic groups that were identified in the study as being ones to consume relatively high amounts of seafood; Indigenous peoples, self-identified group by study authors and not including those from the Arctic and mainly comprised of populations from the Amazonian region.



Fetus: General pop., general population without specific exposures to mercury; Fish consumer, see above under 'Diet'.

Location type: Inland, populations living away from coastal regions, either living close to rivers or lakes from where they might take fish (river/lake) or not associated with any water (no water);

Coastal, populations living on the coast of various oceans (e.g., Mediterr, Mediterranean sea) from where they might take seafood; Multiple, studies where the populations were associated with different categories; unknown, not enough information provided in the study to assign a particular location.

## References Cited in this Supplemental Materials File

ACGIH (2016). TLVs and BEIs. Based on the Documentation of the Threshold Limit Values for Chemical Substances and Physical Agents and Biological Exposure Indices. Cincinnati (OH): Signature Publications.

Bjermo H, Sand S, Nälsén C, Lundh T, Enghardt Barbieri H, Pearson M, Lindroos AK, Jönsson BA, Barregård L, Darnerud PO. Lead, mercury, and cadmium in blood and their relation to diet among Swedish adults. *Food Chem Toxicol.* 2013 Jul;57:161-9. doi: 10.1016/j.fct.2013.03.024.

Burm E, Song I, Ha M, Kim YM, Lee KJ, Kim HC, Lim S, Kim SY, Lee CG, Kim SY, Cheong HK, Sakong J, Kang HT, Son M, Oh GJ, Kim Y, Yang JY, Hong SJ, Seo JH, Kim J, Oh S, Yu J, Chang SS, Kwon HJ, Choi YH, Choi W, Kim S, Yu SD. Representative levels of blood lead, mercury, and urinary cadmium in youth: Korean Environmental Health Survey in Children and Adolescents (KorEHS-C), 2012-2014. *Int J Hyg Environ Health.* 2016 Jul;219(4-5):412-8. doi: 10.1016/j.ijheh.2016.04.004.

Choi, W., S. Kim, Y.-W. Baek, K. Choi, K. Lee, S. Kim, S.D. Yu and K. Choi, 2017. Exposure to environmental chemicals among Korean adults – updates from the second Korean National Environmental Health Survey (20012–2014). *International Journal of Hygiene and Environmental Health*, 220:29-35

Croes K, De Coster S, De Galan S, Morrens B, Loots I, Van de Mierop E, Nelen V, Sioen I, Bruckers L, Nawrot T, Colles A, Den Hond E, Schoeters G, van Larebeke N, Baeyens W, Gao Y. Health effects in the Flemish population in relation to low levels of mercury exposure: from organ to transcriptome level. *Int J Hyg Environ Health.* 2014 Mar;217(2-3):239-47. doi: 10.1016/j.ijheh.2013.06.004.

Dereumeaux C, Saoudi A, Pecheux M, Berat B, de Crouy-Chanel P, Zaros C, Brunel S, Delamaire C, le Tertre A, Lefranc A, Vandentorren S, Guldner L. Biomarkers of exposure to environmental contaminants in French pregnant women from the Elfe cohort in 2011. *Environ Int.* 2016 Dec;97:56-67. doi: 10.1016/j.envint.2016.10.013.

Deutsche Forschungsgemeinschaft 2017. List of MAK and BAT values 2017: Permanent Senate Commission for the Investigation of Health Hazards of Chemical Compounds in the Work Area. Report 53. Weinheim: WILEY-VCH Verlag GmbH & Co. KGaA. DOI:10.1002/9783527812127

Fréry N, Saoudi A, Garnier R, Zeghnoun A, Falq G (2011). Exposition de la population française aux substances chimiques de l'environnement. Vol 1 Saint-Maurice: Institut de veille sanitaire ([http://opac.invs.sante.fr/doc\\_num.php?explnum\\_id=6864](http://opac.invs.sante.fr/doc_num.php?explnum_id=6864), accessed 24 July 2018);

German Environmental Survey, 2017. German Federal Environment Agency. <https://www.umweltbundesamt.de/en/topics/health/assessing-environmentally-related-health-risks/german-environmental-survey-geres> [last accessed Nov 30, 2017]

Health Canada (2017). Fourth report on human biomonitoring of environmental chemicals in Canada. Ottawa: Health Canada; 2017

JECFA (2004). Evaluation of Certain Food Additives and Contaminants. Sixty-first Report of the Joint FAO/WHO Expert Committee on Food Additives. Geneva: World Health Organization/Food and Agriculture Organization (WHO Technical Report Series 922)

JECFA (2007) Methylmercury (addendum) Safety evaluation of certain food additives and contaminants. Prepared by the sixty-seventh meeting of the Joint FAO/WHO Expert Committee on Food Additives (JECFA). Food Additives Series 58. Geneva: World Health Organization; 2007 <http://www.inchem.org/documents/jecfa/jecmono/v58je01.pdf>

Karagas MR, Choi AL, Oken E, Horvat M, Schoeny R, Kamai E, Cowell W, Grandjean P, Korrick S (2012). Evidence on the human health effects of low-level methylmercury exposure. *Environ Health Perspect.* 120(6):799-806.

Legrand M, Feeley M, Tikhonov C, Schoen D, Li-Muller A. Methylmercury blood guidance values for Canada. *Can J Public Health.* 2010 Jan-Feb;101(1):28-31. PubMed PMID: 20364534.

NIPH (2016) Systém monitorování zdravotního stavu obyvatelstva České republiky ve vztahu k životnímu prostředí Souhrnná zpráva za rok 2015 [Environmental Health Monitoring System in the Czech Republic. Summary Report, 2015]. Prague: National Institute of Public Health; 2016 ([http://www.szu.cz/uploads/documents/chzp/souhrnna\\_zprava/Souhrnna\\_15\\_CD.pdf](http://www.szu.cz/uploads/documents/chzp/souhrnna_zprava/Souhrnna_15_CD.pdf))

Puklová V, Krsková A, Cerná M, Cejchanová M, Rehůrková I, Ruprich J, Kratzer K, Kubínová R, Zimová M (2010). The mercury burden of the Czech population: An integrated approach. *Int J Hyg Environ Health.* 2010 Jul;213(4):243-51. doi: 10.1016/j.ijheh.2010.02.002

Schulz C, Angerer J, Ewers U, Kolossa-Gehring M. The German Human Biomonitoring Commission. *Int J Hyg Environ Health.* 2007 May;210(3-4):373-82. Epub 2007 Mar 6. PubMed PMID: 17337242

Snoj Tratnik J, Mazej D, Jagodic M, Kocman D, Stajniko A, Trdin A, Šlejkovec Z, Falnoga I, Osredkar J, Prezelj M, Skitek M, Krsnik M, Sešek-Briški A, Kopal AB, Kononenko L, Horvat M (*submitted to Int J Hyg Env Health*). Results of the first National Human Biomonitoring in Slovenia: trace elements in lactating women and their partners and sources of exposure.

US CDC (2017) Fourth National Report on Human Exposure to Environmental Chemicals, Updated Tables, January 2017, Volume 1. Atlanta (GA): Centers for Disease Control and Prevention.

US EPA (2001). Water Quality Criterion for the Protection of Human Health: Methylmercury Chapter 4: Risk Assessment for Methylmercury. Office of Science and Technology, Office of Water.
