# Supplementary material
Source: PubMed Central journal article supplement (PMC6371716)
Supplement: ehp3904.smcontents.508.pdf [file ehp3904.smcontents.508.pdf]

**Note to readers with disabilities:** *EHP* strives to ensure that all journal content is accessible to all readers. However, some figures and Supplemental Material published in *EHP* articles may not conform to [508 standards](#) due to the complexity of the information being presented. If you need assistance accessing journal content, please contact [ehp508@niehs.nih.gov](mailto:ehp508@niehs.nih.gov). Our staff will work with you to assess and meet your accessibility needs within 3 working days.

### **Supplemental Material**

#### **A State-of-the-Science Review of Mercury Biomarkers in Human Populations Worldwide between 2000 and 2018**

Niladri Basu, Milena Horvat, David C. Evers, Irina Zastenskaya, Pál Weihe, and Joanna Tempowski

#### **Table of Contents**

**Table S1.** Summary of national programs that conduct mercury human biomonitoring.

**Table S2.** Number of individuals sampled and mercury biomarker measurements taken in the national biomonitoring studies.

**Table S3.** Comparison of blood total mercury (Hg) concentrations ( $\mu\text{g/L}$ ) in adults and children from nine countries, reported in national biomonitoring programs.

**Table S4.** Count of sub-populations, individuals, and mercury biomarker measurements from the cross-sectional studies, grouped by WHO region, population group by source of exposure, and type of location.

**Table S5.** Reference values for mercury biomarkers.

**Table S6.** Central and upper median hair mercury levels ( $\mu\text{g/g}$ ) from the cross-sectional studies grouped by WHO region, population group (source of exposure), and type of location.

**Table S7.** Comparison of urinary total mercury (Hg) measurement ( $\mu\text{g/L}$ ) in adults and children in five countries reported in national biomonitoring programs.

**Table S8.** Central and upper median urinary mercury levels ( $\mu\text{g/L}$ ) from the cross-sectional studies, grouped by WHO region, population group (source of exposure), and type of location.

#### **References**

**Additional File** - Excel Document
